# Supplementary material for: Mining patents with large language models elucidates the chemical function landscape
Source: Royal Society of Chemistry journal article supplement (doi:10.1039/d4dd00011k), 2024-01-01
Supplement: d4dd00011k1.pdf [file d4dd00011k1.pdf]

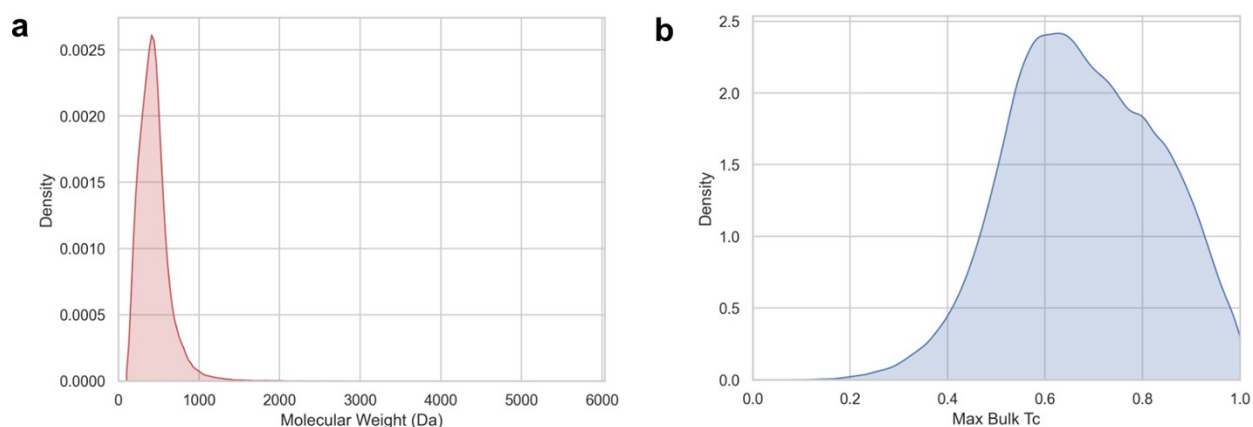

**Figure S1. Molecular weight and structural similarity distribution of the CheF dataset. (a)** Molecular weight of each molecule in the dataset. Minimum: 100.12 Da; Maximum: 5749.60 Da; Mean: 440.79 Da; Std: 203.96 Da. **(b)** Maximum bulk fingerprint Tanimoto coefficient (Tc) for each molecule in the dataset. Bulk Tc measures how similar a given molecule's structure is to all of the other molecules in the dataset. Max Bulk Tc returns the structural similarity of a molecule to the most structurally similar molecule in the dataset. High Max Bulk Tc indicates redundant structures, mid-low Max Bulk Tc indicates diverse structures. Minimum: 0.076; Maximum: 1.00; Mean: 0.68; Std: 0.15.

**Table S1. International Patent Classification (IPC) categories vs ChatGPT-generated functional labels.** IPC categories and ChatGPT-generated labels were obtained for SCHEMBL4156630 (PubChem CID: 87628486) from the patent US-2009156572-A1. The IPC categories include structural classifications (e.g., Ortho-condensed systems, Heterocyclic compounds containing) and broad disease classifications (e.g., Centrally acting analgesics, Antidepressants) but miss out on the fine-grained mechanistic terms that the ChatGPT-aided method captures (e.g., Dopamine-Antagonistic, Serotonin Agonist).

| IPC categories                                                                                                                                                                                                                                                                       | ChatGPT-generated functional labels |
|--------------------------------------------------------------------------------------------------------------------------------------------------------------------------------------------------------------------------------------------------------------------------------------|-------------------------------------|
| C07D471/04 Ortho-condensed systems                                                                                                                                                                                                                                                   | Central Nervous System              |
| C07D401/04 Heterocyclic compounds containing two or more hetero rings, having nitrogen atoms as the only ring hetero atoms, at least one ring being a six-membered ring with only one nitrogen atom containing two hetero rings directly linked by a ring-member-to-ring-member bond | Dopamine-Antagonistic               |
| A61P25/00 Drugs for disorders of the nervous system                                                                                                                                                                                                                                  | Dopamine-Agonistic                  |
| A61P25/04 Centrally acting analgesics, e.g. opioids                                                                                                                                                                                                                                  | Serotonin Agonist                   |
| A61P25/06 Antimigraine agents                                                                                                                                                                                                                                                        | Serotonin Antagonist                |

|                                                                                                                                                                                                                                           |           |
|-------------------------------------------------------------------------------------------------------------------------------------------------------------------------------------------------------------------------------------------|-----------|
| A61P25/18 Antipsychotics, i.e. neuroleptics; Drugs for mania or schizophrenia                                                                                                                                                             | Analgesic |
| A61P25/20 Hypnotics; Sedatives                                                                                                                                                                                                            |           |
| A61P25/24 Antidepressants                                                                                                                                                                                                                 |           |
| A61P25/26 Psychostimulants, e.g. nicotine, cocaine                                                                                                                                                                                        |           |
| A61P25/28 Drugs for disorders of the nervous system for treating neurodegenerative disorders of the central nervous system, e.g. nootropic agents, cognition enhancers, drugs for treating Alzheimer's disease or other forms of dementia |           |
| A61P25/30 Drugs for disorders of the nervous system for treating abuse or dependence                                                                                                                                                      |           |
| A61P43/00 Drugs for specific purposes, not provided for in groups A61P1/00-A61P41/00                                                                                                                                                      |           |
| C07D401/14 Heterocyclic compounds containing two or more hetero rings, having nitrogen atoms as the only ring hetero atoms, at least one ring being a six-membered ring with only one nitrogen atom containing three or more hetero rings |           |

**Table S2. Randomly sampling from highly patented molecules would pollute the dataset labels.** To determine if random sampling could be an option to include molecules with a high number of patent associations (>10,000 patents per molecule), a random sample of 10 patents from 11 distinct molecules was obtained. These patents were categorized as follows: the patent describes the molecule's function (correct), the patent describes the final product's function of which the linked molecule is an intermediate (intermediate), and the patent is irrelevant to the linked molecule (irrelevant).

| Name                        | PubChem CID | Primary Function | # Patents | Correct | Intermediate | Irrelevant |
|-----------------------------|-------------|------------------|-----------|---------|--------------|------------|
| Carvedilol                  | 152743196   | Beta Blocker     | 25959     | 3       | 0            | 7          |
| Tetrakis(acetyloxy)plumbane | 16684437    | Catalyst         | 13113     | 0       | 0            | 10         |
| Inulin                      | 24763       | Fiber            | 69262     | 2       | 0            | 8          |

|                                           |        |                    |       |   |   |    |
|-------------------------------------------|--------|--------------------|-------|---|---|----|
| 3-Hydroxy-2,2-dimethylpropyl methacrylate | 83492  | Acrylate Monomer   | 17741 | 1 | 1 | 8  |
| liothyronine                              | 5920   | Thyroid Hormone    | 30503 | 1 | 0 | 9  |
| dioctyltin                                | 27681  | Plastic Stabilizer | 13255 | 1 | 0 | 9  |
| Amrinone                                  | 3698   | Cardiac Drug       | 12935 | 0 | 0 | 10 |
| N-Isopropylmethylethylamine               | 78485  | Base               | 13500 | 0 | 0 | 10 |
| NADH                                      | 439153 | Metabolite         | 54626 | 0 | 0 | 10 |
| 3-propoxypropan-1-ol                      | 61868  | Solvent            | 30689 | 0 | 0 | 10 |
| Trifluorochloromethane                    | 6392   | Refrigerant        | 13712 | 1 | 0 | 9  |

**Table S3. ChatGPT patent summarization method is invariant to patent version.** To investigate whether the patent version influences the choice of functional labels extracted by ChatGPT, functional labels from two different versions for five distinct patents were obtained. The generated terms were identical in all five cases, providing evidence that the patent version has minimal, if any, impact on the generated functional labels.

| Patent ID & Year    | Functional Terms                                                 | Patent ID & Year       | Functional Terms                                                 |
|---------------------|------------------------------------------------------------------|------------------------|------------------------------------------------------------------|
| US10899724B2 (2016) | fungicides / pesticides / microbiocidal                          | US11066375B2 (2020)    | fungicides / pesticides / microbiocidal                          |
| US9067917B2 (2014)  | FLAP modulators / Inflammation treatment / Respiratory disorders | US20150246052A1 (2015) | FLAP modulators / Inflammation treatment / Respiratory disorders |
| US8133870B2 (2005)  | anti-viral / anti-cancer                                         | US20120213735A1 (2012) | anti-viral / anti-cancer                                         |
| US20120225846A1     | Inhibition / PASK /                                              | US9675584B2            | Inhibition / PASK /                                              |

|                       |                                |                           |                                |
|-----------------------|--------------------------------|---------------------------|--------------------------------|
| (2012)                | Diabetes                       | (2015)                    | Diabetes                       |
| US7902192B2<br>(2004) | Inhibitors / P38 /<br>Cytokine | US20110301160A1<br>(2010) | Inhibitors / P38 /<br>Cytokine |

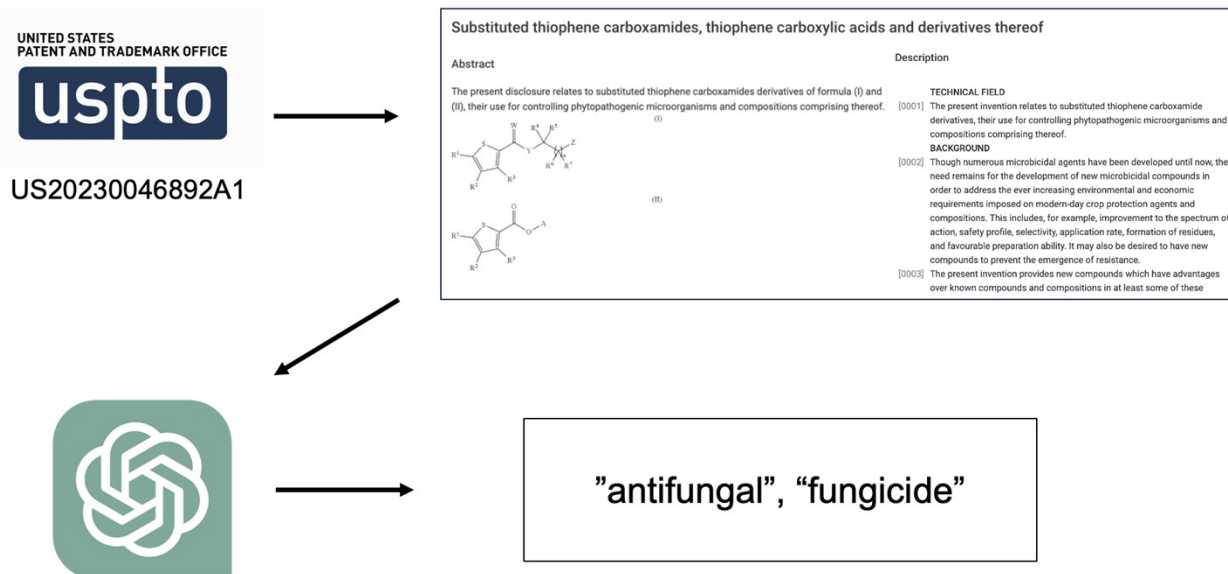

**Figure S2: Example of LLM-based chemical function extraction.** Patent IDs are used to retrieve the patent title, abstract, and description from Google Patents. ChatGPT is then prompted to extract out the chemical function of the molecule being described by the patent.

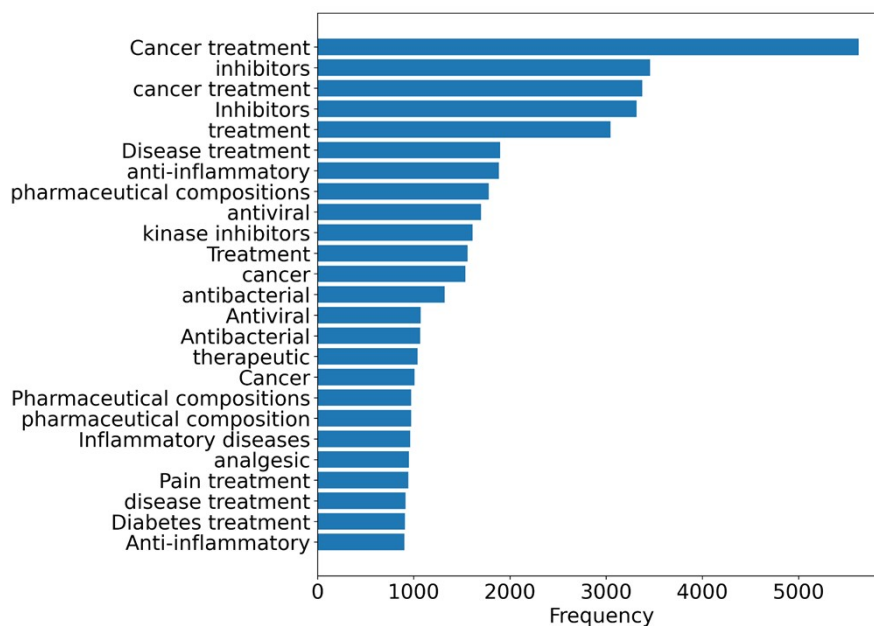

**Figure S3: Most frequent patent summarizations.** The most frequent patent summarizations do not immediately exhibit any dataset-independent biases. The bias towards broad treatment

terms, such as cancer, antiviral, and analgesic, likely emerged because these are desirable target functions and are thus overrepresented in patents.

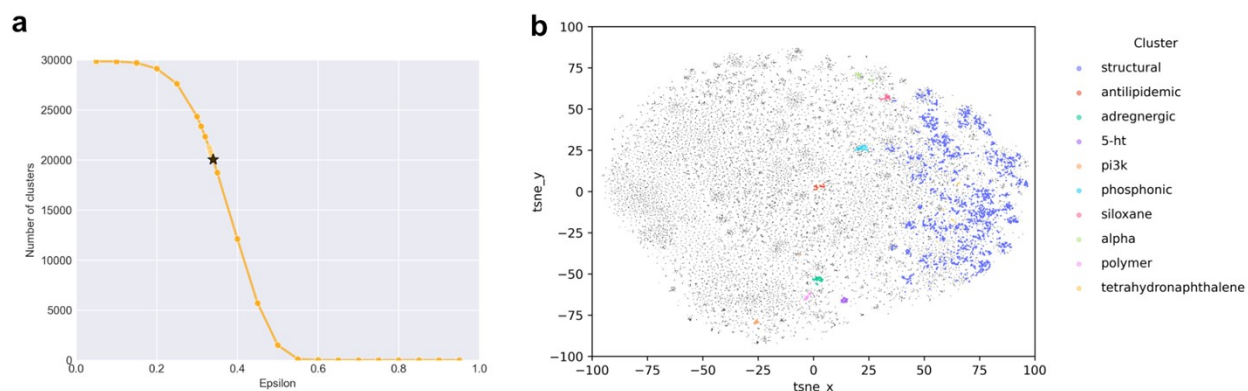

**Figure S4: DBSCAN clustering on ada-002 text embeddings reduces the number of labels.**

**(a)** The optimal DBSCAN epsilon value was defined as the cutoff resulting in the smallest number of clusters without overtly false categories appearing (e.g., merging antiviral, antibacterial, and antifungal). The optimal epsilon was found to be 0.340 for the dataset considered herein (marked by black star), resulting in a consolidation from 29,854 labels to 20,030 clusters. The labels in each cluster were then consolidated with ChatGPT, creating a set of 20,030 labels. **(b)** t-SNE of the ada-002 text embeddings, colored by the top 10 largest clusters. The largest cluster, found to be all IUPAC structural terms, was removed from the dataset to reduce excessive non-generalizable labels.



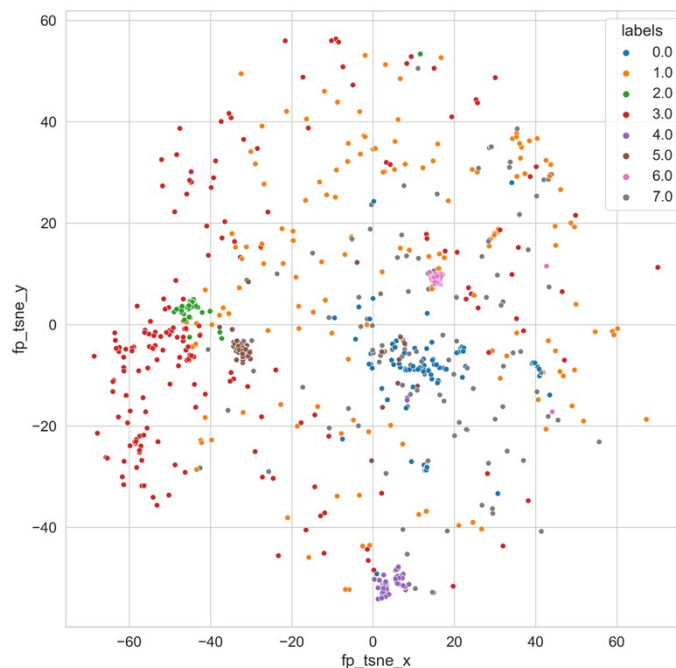

**Figure S6: K-means clustering on molecules containing ‘hcv’ elucidates Hepatitis C Virus (HCV) antiviral modalities.** The top 20 most frequently occurring labels were obtained for each of 8 clusters to determine their modalities (if applicable). Cluster 4 was the only cluster to contain ‘nucleoside’ (n=65) and ‘nucleotide’ (n=12) in the top 20 labels, indicating this cluster primarily contained HCV antiviral nucleoside derivatives likely inhibiting the NS5B polymerase. Cluster 2 contained ‘protease’ (n=85), ‘peptide’ (n=35), and ‘serine’ (n=15), indicating that this cluster primarily contained peptidomimetic protease inhibitors acting on the NS3 serine protease. Cluster 5 contained ‘protease’ (n=108), ‘macrocyclic’ (n=42), and serine (n=8), indicating that this cluster contained macrocyclic compounds acting likely as NS3 serine protease inhibitors. Cluster 6 contained no specific mechanistic terms, alluding to the possible mechanism of these molecules inhibiting the NS5A protein.

**Table S4: GPT-4 graph community summarizations.** All labels from the ten most abundant clusters were fed into GPT-4 for categorical summarization. These outputs were verified to be representative of the labels and were further consolidated by the authors into concise categories.

| GPT4 Cluster Summary                                                                                                                                                                                                  | Label in Graph                                                  |
|-----------------------------------------------------------------------------------------------------------------------------------------------------------------------------------------------------------------------|-----------------------------------------------------------------|
| Chemical Processes & Reactions, Materials & Substances, Photographic & Printing Processes, Cosmetic & Dermatological Applications, Industrial Manufacturing & Production, Sensory Properties                          | Material, Industrial, Synthesis, & Dermatology                  |
| Antiviral, Cancer, Cellular Processes, Enzymes, Immunology, Oncology, Protein Interactions, Therapy & Drug Development                                                                                                | Antiviral & Cancer                                              |
| Pain Management, Hormonal Regulation, Gastrointestinal Conditions, Neurological Conditions, Reproductive Health, Obesity Management, Addiction Treatment, Sleep Disorders, Immune Response, Cardiovascular Conditions | Neurological, Hormonal, Gastrointestinal, & Reproductive Health |
| Chemical Compounds & Materials, Electronic & Optoelectronic Devices, Energy & Efficiency, Light & Emission Properties, Stability & Durability, Quantum & Thermodynamics                                               | Electronic, Photochemical, & Stability                          |
| Neurodegenerative Diseases, Inflammatory & Autoimmune Diseases, Respiratory Diseases, Immune Response & Regulation, Enzymes & Mediators, Drug Development & Therapeutics                                              | Neurodegenerative, Autoimmune, Inflammation, & Respiratory      |
| Antibacterial, Antifungal, Antiparasitic, Antimalarial, Antimicrobial, Antiprotozoal, Antitubercular, Insecticide, Herbicide, Fungicide, Pesticide, Acaricide, Nematicidal, Agricultural & Health Protection          | Anti-Organism & Agricultural                                    |
| Drug Development & Delivery, Diagnostic & Monitoring, Gene & Protein Regulation, Epigenetics & Transcription, Immunology & Vaccines                                                                                   | Pharmaceutical Research, Genetic Regulation, Immunology         |
| Neurological & Psychiatric Disorders, Cognitive & Memory Function, Neuropharmacology & Neurotransmission, Mood & Mental Health, Urologic & Sexual Health                                                              | Neurological & Urologic                                         |



|                                                                                                                                        |                                      |
|----------------------------------------------------------------------------------------------------------------------------------------|--------------------------------------|
| Lipid Metabolism & Cardiovascular Health, Diabetes Management, Organ Health & Protection                                               | Cardiovascular & Lipid Metabolism    |
| Cardiovascular & Renal Disorders, Ion Channels & Transporters, Anesthetics & Muscle Relaxants, Neurological Disorders & Eye Conditions | Cardiovascular, Renal, & Ion Channel |

**Table S5: Arbitrary 20 CheF labels from each summarized co-occurrence neighborhood.** Modularity-based community detection was performed on the CheF co-occurrence graph to obtain 19 distinct communities. The communities appeared to broadly coincide with the semantic meaning of the contained labels, and the largest 10 communities were summarized to a common label. Shown are a random 20 labels from the first five summarized communities.

| <b>Material, Industrial, Synthesis, &amp; Dermatology</b> | <b>Antiviral &amp; Cancer</b> | <b>Neurological, Hormonal, Gastrointestinal, &amp; Reproductive Health</b> | <b>Electrical, Photochemical, &amp; Stability</b> | <b>Neurodegenerative, Autoimmune, Inflammation, &amp; Respiratory</b> |
|-----------------------------------------------------------|-------------------------------|----------------------------------------------------------------------------|---------------------------------------------------|-----------------------------------------------------------------------|
| absorb                                                    | aid                           | analgesic                                                                  | carbazole                                         | activate                                                              |
| acid                                                      | antiviral                     | condition                                                                  | compound                                          | adhesion                                                              |
| binder                                                    | cancer                        | ligand                                                                     | expand                                            | alzheimer                                                             |
| care                                                      | cell                          | modulate                                                                   | life                                              | amyloid                                                               |
| cosmetic                                                  | g12                           | modulator                                                                  | light                                             | anti-inflammatory                                                     |
| destabilize                                               | hbv                           | p2x7                                                                       | material                                          | autoimmune                                                            |
| form                                                      | hcv                           | pain                                                                       | activated                                         | cox                                                                   |
| functional                                                | hepatitis                     | prophylaxis                                                                | amine                                             | disease                                                               |
| ionic                                                     | hiv                           | prostate                                                                   | anisotropy                                        | elastase                                                              |
| method                                                    | inhibit                       | receptor                                                                   | aromatic                                          | il-17                                                                 |
| modification                                              | inhibition                    | relief                                                                     | blue                                              | inflammation                                                          |
| optical                                                   | inhibitor                     | selective                                                                  | capability                                        | inflammatory                                                          |
| photochromic                                              | integrase                     | tgr5                                                                       | characteristic                                    | interferon                                                            |
| plastic                                                   | kinase                        | tract                                                                      | charge                                            | lung                                                                  |
| polymer                                                   | kras                          | treatment                                                                  | condensed                                         | neurodegenera                                                         |

|             |                      |            |            |                   |
|-------------|----------------------|------------|------------|-------------------|
|             |                      |            |            | tive              |
| preserve    | mapk                 | various    | crystal    | neuroinflammation |
| production  | nucleoside           | 5-ht       | cyclic     | sting             |
| protective  | phosphatidylinositol | addiction  | device     | airway            |
| sensitivity | phosphorylation      | adrenergic | dielectric | allergic          |
| skin        | protein              | affinity   | diode      | allergy           |

**Table S6: Arbitrary 20 CheF labels from each summarized co-occurrence neighborhood.** Modularity-based community detection was performed on the CheF co-occurrence graph to obtain 19 distinct communities. The communities appeared to broadly coincide with the semantic meaning of the contained labels, and the largest 10 communities were summarized to a common label. Shown are a random 20 labels from the second five summarized communities.

| <b>Anti-Organism &amp; Agricultural</b> | <b>Pharmaceutical Research, Genetic Regulation, Immunology</b> | <b>Neurological &amp; Urological</b> | <b>Cardiovascular &amp; Lipid Metabolism</b> | <b>Cardiovascular, Renal, &amp; Ion Channel</b> |
|-----------------------------------------|----------------------------------------------------------------|--------------------------------------|----------------------------------------------|-------------------------------------------------|
| amide                                   | assay                                                          | anticonvulsant                       | carbonic                                     | cardiovascular                                  |
| control                                 | bind                                                           | cerebral                             | ischemia                                     | channel                                         |
| derivative                              | bromodomain                                                    | disorder                             | level                                        | ion                                             |
| infection                               | diagnostic                                                     | function                             | liver                                        | stroke                                          |
| protection                              | drug                                                           | mitochondrial                        | prevention                                   | ace                                             |
| acaricide                               | potential                                                      | neural                               | reducer                                      | anesthetic                                      |
| acetic                                  | psma                                                           | neuroprotective                      | reducing                                     | angina                                          |
| animal                                  | regulator                                                      | pde                                  | reduction                                    | angiotensin                                     |
| anti                                    | sirtuin                                                        | schizophrenia                        | regulate                                     | anti-hypertensive                               |
| anti-malarial                           | targeting                                                      | sedative                             | releasing                                    | blocker                                         |
| anti-microbial                          | alter                                                          | system                               | retinoid                                     | calcium                                         |

|                |                 |                |                 |              |
|----------------|-----------------|----------------|-----------------|--------------|
| antiparasitic  | analog          | urologic       | vap             | cardiac      |
| aryl           | atp             | anti-psychotic | vascular        | cardiotonic  |
| azetidín       | atrophy         | antidepressant | aldose          | circulation  |
| azetidine      | bioavailability | antitussive    | alleviate       | co-transport |
| bacterial      | biological      | anxiolytic     | antilipidemic   | contraction  |
| bactericide    | biomarker       | brain          | blood           | diuretic     |
| beta-lactamase | combinatorial   | central        | cholesterol     | failure      |
| bicyclic       | cytotoxic       | cholinergic    | cholesterolemia | heart        |
| bridge         | deacetylase     | cns            | complication    | hypertensive |

**Table S7: Fingerprint models benchmarked on CheF.** To assess a baseline benchmark on the CheF dataset of ~100K molecules, several molecular fingerprint-based models were trained on 90% of the training data and evaluated on the 10% test set holdout. Macro average ROC-AUC and PR-AUC was calculated across all 1,522 labels. Logistic regression (LR), random forest classifier (RFC), and a 2-layer multilayer perceptron (MLP) were trained. Parameters for LR and RFC were chosen to be common default values, whereas the MLP layer number and size were chosen through a 5-fold cross validation.

| Model    | ROC-AUC     | PR-AUC      |
|----------|-------------|-------------|
| FP + LR  | <b>0.84</b> | <b>0.20</b> |
| FP + RFC | 0.81        | 0.12        |
| FP + MLP | 0.78        | 0.08        |

**Table S8: Structure-to-function model can retrodict functions of held-out over-patented molecules.** Early in the data pipeline, molecules with >10 patents were withheld to avoid data pollution. Shown are the top 10 predicted terms for five arbitrary over-patented molecules withheld from the dataset. Withholding over-patented molecules has apparently minimal detrimental impact on models trained on the CheF dataset as the model appears to infer over-patented function based on its less patented derivatives.

| <b>Penicillin G<br/>(antibiotic)</b> | <b>Zidovudine<br/>(HIV antiviral)</b> | <b>Morphine<br/>(analgesic)</b> | <b>Psilocin<br/>(psychedelic)</b> | <b>Terephthalate<br/>(plastic monomer)</b> |
|--------------------------------------|---------------------------------------|---------------------------------|-----------------------------------|--------------------------------------------|
| anti-microbial                       | nucleoside                            | opioid                          | treatment                         | inhibitor                                  |
| penicillin                           | treatment                             | analgesic                       | receptor                          | polymer                                    |
| derivative                           | antiviral                             | receptor                        | inhibitor                         | compound                                   |
| beta-lactamase                       | acid                                  | treatment                       | disease                           | treatment                                  |
| intermediate                         | nucleic                               | pain                            | 5-ht                              | acid                                       |
| acid                                 | derivative                            | antagonist                      | derivative                        | derivative                                 |
| cephalosporin                        | analog                                | agonist                         | disorder                          | agent                                      |
| ester                                | compound                              | therapeutic                     | selective                         | material                                   |
| agent                                | dna                                   | derivative                      | acid                              | high                                       |
| inhibitor                            | rna                                   | inhibitor                       | agonist                           | therapeutic                                |

| Name                        | P(hcv) | P(hepatitis) | P(antiviral) | P(ns) | P(protease) | P(polymerase) | P(ace) | P(btk) |
|-----------------------------|--------|--------------|--------------|-------|-------------|---------------|--------|--------|
| DACLATASVIR DIHYDROCHLORIDE | 0.95   | 0.42         | 0.95         | 0.84  | 0.02        | 0.00          | 0.00   | 0.01   |
| DACLATASVIR                 | 0.95   | 0.42         | 0.95         | 0.84  | 0.02        | 0.00          | 0.00   | 0.01   |
| GRAZOPREVIR                 | 0.94   | 0.41         | 0.81         | 0.59  | 0.73        | 0.00          | 0.00   | 0.01   |
| BOCEPREVIR                  | 0.91   | 0.73         | 0.42         | 0.03  | 0.88        | 0.00          | 0.00   | 0.00   |
| PARITAPREVIR                | 0.83   | 0.12         | 0.75         | 0.67  | 0.73        | 0.00          | 0.00   | 0.00   |
| SIMEPREVIR                  | 0.83   | 0.06         | 0.35         | 0.09  | 0.07        | 0.01          | 0.00   | 0.00   |
| SIMEPREVIR SODIUM           | 0.83   | 0.06         | 0.35         | 0.09  | 0.07        | 0.01          | 0.00   | 0.00   |
| VOXILAPREVIR                | 0.75   | 0.29         | 0.65         | 0.24  | 0.34        | 0.00          | 0.00   | 0.00   |
| SOFOSBUVIR                  | 0.70   | 0.16         | 0.86         | 0.03  | 0.00        | 0.23          | 0.00   | 0.00   |
| LEDIPASVIR                  | 0.67   | 0.53         | 0.86         | 0.15  | 0.01        | 0.00          | 0.00   | 0.00   |
| ELBASVIR                    | 0.61   | 0.58         | 0.83         | 0.15  | 0.01        | 0.01          | 0.00   | 0.00   |
| GLECAPREVIR                 | 0.56   | 0.15         | 0.63         | 0.26  | 0.23        | 0.00          | 0.00   | 0.01   |
| VELPATASVIR                 | 0.54   | 0.68         | 0.81         | 0.16  | 0.02        | 0.00          | 0.00   | 0.01   |
| OMBITASVIR                  | 0.41   | 0.25         | 0.41         | 0.02  | 0.12        | 0.00          | 0.00   | 0.00   |
| NELARABINE                  | 0.33   | 0.05         | 0.45         | 0.00  | 0.00        | 0.01          | 0.00   | 0.00   |
| PIBRENTASVIR                | 0.20   | 0.32         | 0.35         | 0.02  | 0.01        | 0.00          | 0.00   | 0.01   |
| BAZEDOXIFENE                | 0.10   | 0.07         | 0.07         | 0.01  | 0.01        | 0.01          | 0.00   | 0.00   |
| BAZEDOXIFENE ACETATE        | 0.10   | 0.07         | 0.07         | 0.01  | 0.01        | 0.01          | 0.00   | 0.00   |
| TEGAFUR                     | 0.09   | 0.02         | 0.43         | 0.00  | 0.01        | 0.01          | 0.00   | 0.00   |
| MICAFUNGIN                  | 0.08   | 0.04         | 0.08         | 0.03  | 0.19        | 0.01          | 0.00   | 0.00   |
| MICAFUNGIN SODIUM           | 0.08   | 0.04         | 0.08         | 0.03  | 0.19        | 0.01          | 0.00   | 0.00   |
| ACYCLOVIR SODIUM            | 0.08   | 0.02         | 0.74         | 0.00  | 0.00        | 0.01          | 0.00   | 0.00   |
| RUCAPARIB CAMSYLATE         | 0.08   | 0.09         | 0.10         | 0.03  | 0.00        | 0.01          | 0.00   | 0.01   |
| PERINDOPRIL ERBUMINE        | 0.08   | 0.08         | 0.11         | 0.02  | 0.06        | 0.00          | 0.20   | 0.00   |
| DARIDOREXANT HYDROCHLORIDE  | 0.08   | 0.03         | 0.07         | 0.03  | 0.00        | 0.00          | 0.00   | 0.01   |
| DARIDOREXANT                | 0.08   | 0.03         | 0.07         | 0.03  | 0.00        | 0.00          | 0.00   | 0.01   |
| ACALABRUTINIB               | 0.07   | 0.06         | 0.23         | 0.09  | 0.03        | 0.00          | 0.00   | 0.78   |
| PERINDOPRIL ARGININE        | 0.07   | 0.07         | 0.11         | 0.02  | 0.06        | 0.00          | 0.15   | 0.00   |
| CYTARABINE                  | 0.07   | 0.01         | 0.32         | 0.00  | 0.00        | 0.02          | 0.00   | 0.00   |
| PERINDOPRIL                 | 0.07   | 0.07         | 0.11         | 0.02  | 0.07        | 0.00          | 0.20   | 0.00   |
| IDOXURIDINE                 | 0.07   | 0.01         | 0.43         | 0.00  | 0.01        | 0.03          | 0.00   | 0.00   |
| MARIBAVIR                   | 0.07   | 0.04         | 0.20         | 0.00  | 0.00        | 0.01          | 0.00   | 0.00   |
| ACALABRUTINIB MALEATE       | 0.07   | 0.05         | 0.24         | 0.09  | 0.02        | 0.00          | 0.00   | 0.78   |
| ADENOSINE PHOSPHATE         | 0.07   | 0.03         | 0.17         | 0.00  | 0.00        | 0.02          | 0.00   | 0.00   |
| GANCICLOVIR SODIUM          | 0.07   | 0.01         | 0.70         | 0.00  | 0.00        | 0.01          | 0.00   | 0.00   |
| REMDESIVIR                  | 0.06   | 0.07         | 0.82         | 0.02  | 0.01        | 0.04          | 0.00   | 0.00   |
| FLUDARABINE PHOSPHATE       | 0.06   | 0.03         | 0.17         | 0.00  | 0.00        | 0.01          | 0.00   | 0.00   |
| GEMCITABINE                 | 0.06   | 0.02         | 0.66         | 0.00  | 0.00        | 0.02          | 0.00   | 0.00   |
| GEMCITABINE HYDROCHLORIDE   | 0.06   | 0.02         | 0.66         | 0.00  | 0.00        | 0.02          | 0.00   | 0.00   |
| URIDINE TRIACETATE          | 0.06   | 0.01         | 0.25         | 0.00  | 0.00        | 0.02          | 0.00   | 0.00   |
| RUCAPARIB                   | 0.06   | 0.10         | 0.15         | 0.02  | 0.00        | 0.01          | 0.00   | 0.01   |
| PENCICLOVIR                 | 0.06   | 0.03         | 0.50         | 0.00  | 0.00        | 0.02          | 0.00   | 0.00   |
| AMDINOCILLIN PIVOXIL        | 0.05   | 0.01         | 0.04         | 0.01  | 0.02        | 0.01          | 0.00   | 0.00   |
| CAPECITABINE                | 0.05   | 0.01         | 0.25         | 0.00  | 0.00        | 0.01          | 0.00   | 0.00   |
| FLOXURIDINE                 | 0.05   | 0.01         | 0.41         | 0.00  | 0.00        | 0.02          | 0.00   | 0.00   |
| BRIVARACETAM                | 0.05   | 0.01         | 0.07         | 0.01  | 0.05        | 0.00          | 0.00   | 0.00   |
| DITHIAZANINE                | 0.05   | 0.02         | 0.07         | 0.00  | 0.01        | 0.00          | 0.00   | 0.00   |
| BRINZOLAMIDE                | 0.05   | 0.08         | 0.15         | 0.02  | 0.02        | 0.01          | 0.00   | 0.00   |
| ENASIDENIB                  | 0.04   | 0.04         | 0.05         | 0.00  | 0.00        | 0.00          | 0.00   | 0.00   |
| ANIDULAFUNGIN               | 0.04   | 0.05         | 0.12         | 0.01  | 0.22        | 0.00          | 0.00   | 0.00   |

**Figure S7: Top 50 FDA-approved drugs predicted to contain the label 'hcv'.** The Stage-4 approved drugs list from OpenTargets was passed through the CheF label prediction model. Results were sorted by 'hcv' probability. Relevant and high abundance labels displayed for clarity. Green cells represent approved-use labels from on the OpenTargets page, and red cells represent no approved usage relevant to the given term.
