# Supplementary material for: Mining patents with large language models elucidates the chemical function landscape
Source: Royal Society of Chemistry journal article supplement (doi:10.1039/d4dd00011k), 2024-01-01
Supplement: d4dd00011k3.pdf [file d4dd00011k3.pdf]

UNITED STATES  
PATENT AND TRADEMARK OFFICE

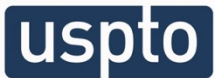

US20230046892A1

Substituted thiophene carboxamides, thiophene carboxylic acids and derivatives thereof

Abstract

The present disclosure relates to substituted thiophene carboxamides derivatives of formula (I) and (II), their use for controlling phytopathogenic microorganisms and compositions comprising thereof.

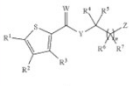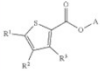

Description

TECHNICAL FIELD

[0001] The present invention relates to substituted thiophene carboxamide derivatives, their use for controlling phytopathogenic microorganisms and compositions comprising thereof.

BACKGROUND

[0002] Though numerous microbicidal agents have been developed until now, the need remains for the development of new microbicidal compounds in order to address the ever increasing environmental and economic requirements imposed on modern-day crop protection agents and compositions. This includes, for example, improvement to the spectrum of action, safety profile, selectivity, application rate, formation of residues, and favourable preparation ability. It may also be desired to have new compounds to prevent the emergence of resistance.

[0003] The present invention provides new compounds which have advantages over known compounds and compositions in at least some of these

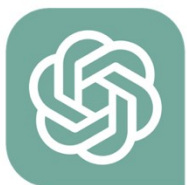

"antifungal", "fungicide"
