# Supplementary material for: Mining patents with large language models elucidates the chemical function landscape
Source: Royal Society of Chemistry journal article supplement (doi:10.1039/d4dd00011k), 2024-01-01

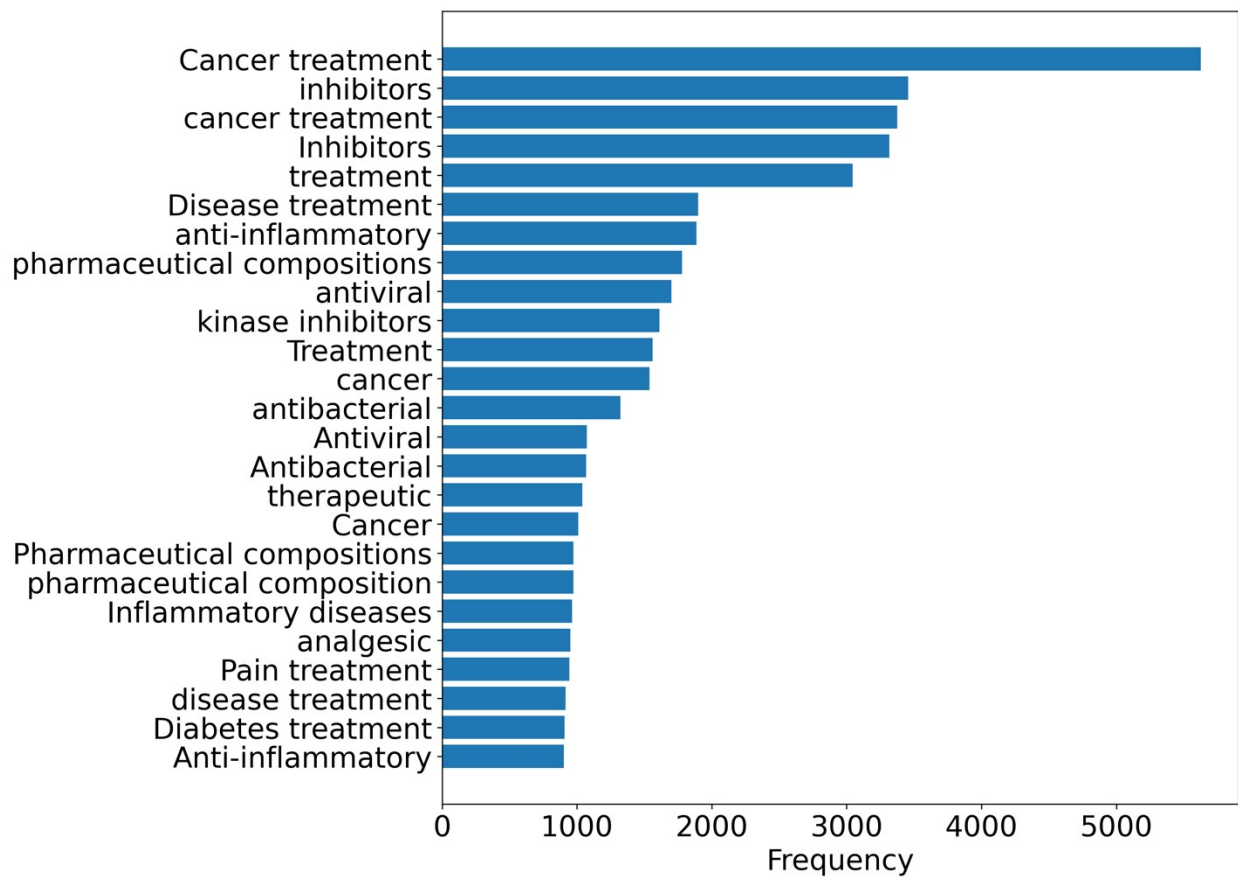

Supplement: d4dd00011k4.pdf [file d4dd00011k4.pdf]
