# Supplementary material for: Mining patents with large language models elucidates the chemical function landscape
Source: Royal Society of Chemistry journal article supplement (doi:10.1039/d4dd00011k), 2024-01-01
Supplement: d4dd00011k8.pdf [file d4dd00011k8.pdf]

| Name                                 | P(hcv) | P(hepatitis) | P(antiviral) | P(ns) | P(protease) | P(polymerase) | P(hiv) | P(integrase) | P(ace) | P(btk) |
|--------------------------------------|--------|--------------|--------------|-------|-------------|---------------|--------|--------------|--------|--------|
| DACLATASVIR<br>DIHYDROCHLORIDE       | 0.96   | 0.72         | 0.81         | 0.95  | 0.08        | 0.01          | 0.07   | 0.00         | 0.00   | 0.01   |
| DACLATASVIR                          | 0.96   | 0.72         | 0.81         | 0.95  | 0.08        | 0.01          | 0.07   | 0.00         | 0.00   | 0.01   |
| GRAZOPREVIR                          | 0.92   | 0.55         | 0.56         | 0.86  | 0.59        | 0.00          | 0.02   | 0.00         | 0.00   | 0.00   |
| BOCEPREVIR                           | 0.87   | 0.64         | 0.36         | 0.15  | 0.79        | 0.01          | 0.02   | 0.00         | 0.00   | 0.00   |
| VELPATASVIR                          | 0.73   | 0.48         | 0.50         | 0.38  | 0.05        | 0.01          | 0.02   | 0.00         | 0.00   | 0.00   |
| PARITAPREVIR                         | 0.70   | 0.21         | 0.47         | 0.62  | 0.41        | 0.00          | 0.02   | 0.00         | 0.00   | 0.00   |
| VOXILAPREVIR                         | 0.69   | 0.29         | 0.34         | 0.81  | 0.47        | 0.00          | 0.02   | 0.00         | 0.00   | 0.00   |
| ELBASVIR                             | 0.66   | 0.58         | 0.59         | 0.45  | 0.02        | 0.02          | 0.03   | 0.00         | 0.00   | 0.00   |
| LEDIPASVIR                           | 0.62   | 0.39         | 0.55         | 0.36  | 0.03        | 0.01          | 0.05   | 0.00         | 0.00   | 0.00   |
| SIMEPREVIR                           | 0.61   | 0.20         | 0.26         | 0.24  | 0.10        | 0.01          | 0.02   | 0.00         | 0.00   | 0.00   |
| SIMEPREVIR<br>SODIUM                 | 0.61   | 0.20         | 0.26         | 0.24  | 0.10        | 0.01          | 0.02   | 0.00         | 0.00   | 0.00   |
| GLEGAPREVIR                          | 0.54   | 0.15         | 0.28         | 0.56  | 0.19        | 0.00          | 0.02   | 0.00         | 0.00   | 0.00   |
| SOFOSBUVIR                           | 0.51   | 0.18         | 0.72         | 0.04  | 0.03        | 0.06          | 0.04   | 0.00         | 0.00   | 0.00   |
| OMBITASVIR                           | 0.38   | 0.17         | 0.14         | 0.03  | 0.06        | 0.00          | 0.01   | 0.00         | 0.00   | 0.00   |
| REMDESIVIR                           | 0.23   | 0.19         | 0.79         | 0.02  | 0.07        | 0.02          | 0.20   | 0.07         | 0.00   | 0.00   |
| PIBRENTASVIR                         | 0.22   | 0.15         | 0.21         | 0.13  | 0.01        | 0.00          | 0.04   | 0.00         | 0.00   | 0.00   |
| NELARABINE                           | 0.19   | 0.08         | 0.54         | 0.01  | 0.00        | 0.01          | 0.04   | 0.00         | 0.00   | 0.00   |
| ACALABRUTINIB                        | 0.13   | 0.09         | 0.26         | 0.12  | 0.01        | 0.01          | 0.02   | 0.00         | 0.00   | 0.61   |
| PERINDOPRIL<br>ARGININE              | 0.13   | 0.06         | 0.03         | 0.06  | 0.08        | 0.00          | 0.00   | 0.00         | 0.05   | 0.00   |
| PERINDOPRIL<br>ERBUMINE              | 0.12   | 0.05         | 0.03         | 0.08  | 0.08        | 0.00          | 0.00   | 0.00         | 0.09   | 0.00   |
| FOSINOPRIL<br>SODIUM                 | 0.12   | 0.04         | 0.15         | 0.02  | 0.04        | 0.01          | 0.04   | 0.00         | 0.03   | 0.00   |
| FOSINOPRIL                           | 0.12   | 0.04         | 0.15         | 0.02  | 0.04        | 0.01          | 0.04   | 0.00         | 0.03   | 0.00   |
| SPIRAPRIL                            | 0.11   | 0.05         | 0.09         | 0.07  | 0.05        | 0.01          | 0.01   | 0.00         | 0.23   | 0.00   |
| SPIRAPRIL<br>HYDROCHLORIDE           | 0.11   | 0.05         | 0.09         | 0.07  | 0.05        | 0.01          | 0.01   | 0.00         | 0.23   | 0.00   |
| PERINDOPRIL                          | 0.11   | 0.04         | 0.03         | 0.07  | 0.08        | 0.00          | 0.00   | 0.00         | 0.08   | 0.00   |
| ACALABRUTINIB<br>MALEATE             | 0.11   | 0.08         | 0.24         | 0.10  | 0.01        | 0.01          | 0.02   | 0.00         | 0.00   | 0.53   |
| ATAZANAVIR                           | 0.11   | 0.02         | 0.22         | 0.02  | 0.63        | 0.00          | 0.15   | 0.00         | 0.00   | 0.00   |
| ATAZANAVIR<br>SULFATE                | 0.10   | 0.02         | 0.21         | 0.02  | 0.65        | 0.00          | 0.15   | 0.00         | 0.00   | 0.00   |
| BAZEDOXIFENE                         | 0.10   | 0.06         | 0.08         | 0.03  | 0.01        | 0.02          | 0.00   | 0.00         | 0.00   | 0.00   |
| BAZEDOXIFENE<br>ACETATE              | 0.09   | 0.06         | 0.07         | 0.02  | 0.01        | 0.02          | 0.00   | 0.00         | 0.00   | 0.00   |
| SORIVUDINE                           | 0.09   | 0.02         | 0.36         | 0.01  | 0.00        | 0.02          | 0.03   | 0.00         | 0.00   | 0.00   |
| AZACITIDINE                          | 0.08   | 0.06         | 0.17         | 0.01  | 0.00        | 0.01          | 0.01   | 0.00         | 0.00   | 0.00   |
| MICAFUNGIN                           | 0.08   | 0.03         | 0.09         | 0.06  | 0.10        | 0.00          | 0.01   | 0.00         | 0.00   | 0.00   |
| MICAFUNGIN<br>SODIUM                 | 0.08   | 0.03         | 0.09         | 0.06  | 0.10        | 0.00          | 0.01   | 0.00         | 0.00   | 0.00   |
| RALTEGRAVIR                          | 0.08   | 0.04         | 0.48         | 0.01  | 0.07        | 0.00          | 0.41   | 0.48         | 0.00   | 0.00   |
| RALTEGRAVIR<br>POTASSIUM             | 0.08   | 0.04         | 0.48         | 0.01  | 0.07        | 0.00          | 0.41   | 0.48         | 0.00   | 0.00   |
| PENTOBARBITAL<br>SODIUM              | 0.07   | 0.02         | 0.04         | 0.02  | 0.02        | 0.01          | 0.00   | 0.00         | 0.00   | 0.00   |
| METHOHEXITAL<br>SODIUM               | 0.07   | 0.02         | 0.07         | 0.03  | 0.03        | 0.01          | 0.01   | 0.00         | 0.00   | 0.00   |
| ANIDULAFUNGIN                        | 0.07   | 0.06         | 0.09         | 0.02  | 0.13        | 0.00          | 0.01   | 0.00         | 0.00   | 0.00   |
| TRANDOLAPRIL                         | 0.07   | 0.03         | 0.02         | 0.04  | 0.16        | 0.00          | 0.01   | 0.00         | 0.20   | 0.00   |
| CYTARABINE                           | 0.07   | 0.02         | 0.26         | 0.00  | 0.00        | 0.01          | 0.02   | 0.00         | 0.00   | 0.00   |
| PENCICLOVIR                          | 0.07   | 0.05         | 0.40         | 0.00  | 0.00        | 0.01          | 0.03   | 0.00         | 0.00   | 0.00   |
| GEMCITABINE<br>HYDROCHLORIDE         | 0.06   | 0.03         | 0.39         | 0.01  | 0.01        | 0.01          | 0.07   | 0.00         | 0.00   | 0.00   |
| GEMCITABINE                          | 0.06   | 0.03         | 0.39         | 0.01  | 0.01        | 0.01          | 0.07   | 0.00         | 0.00   | 0.00   |
| RAMIPRIL                             | 0.06   | 0.02         | 0.03         | 0.03  | 0.18        | 0.00          | 0.01   | 0.00         | 0.19   | 0.00   |
| FLOXURIDINE                          | 0.06   | 0.02         | 0.26         | 0.00  | 0.01        | 0.01          | 0.03   | 0.00         | 0.00   | 0.00   |
| GLASDEGIB                            | 0.05   | 0.04         | 0.06         | 0.04  | 0.00        | 0.00          | 0.02   | 0.00         | 0.00   | 0.00   |
| TENOFOVIR<br>ALAFENAMIDE<br>FUMARATE | 0.05   | 0.03         | 0.45         | 0.01  | 0.00        | 0.02          | 0.11   | 0.00         | 0.00   | 0.00   |
| MARIBAVIR                            | 0.05   | 0.03         | 0.13         | 0.01  | 0.01        | 0.01          | 0.01   | 0.00         | 0.00   | 0.00   |
| GLASDEGIB<br>MALEATE                 | 0.05   | 0.03         | 0.06         | 0.03  | 0.00        | 0.00          | 0.02   | 0.00         | 0.00   | 0.00   |
